# Supplementary material
Source: HighWire-hosted journal article supplement (https://bmjopen.bmj.com/content/10/7/e036879)
Supplement: inline-supplementary-material-5 [file inline-supplementary-material-5.pdf]

## Supplementary file 5

Page 1 of 30

|                                                                                                |                            |                          |                          |                                                                                                            |                       |
|------------------------------------------------------------------------------------------------|----------------------------|--------------------------|--------------------------|------------------------------------------------------------------------------------------------------------|-----------------------|
| <b>Assessor's name:</b>                                                                        |                            |                          |                          |                                                                                                            |                       |
| <b>Group/facilitator ID:</b>                                                                   |                            |                          |                          |                                                                                                            |                       |
| <b>Date:</b>                                                                                   |                            |                          |                          |                                                                                                            |                       |
| <b>Week 1: Group session 1, Stroke Journey (2.5 hours, with breaks)</b>                        |                            |                          |                          |                                                                                                            |                       |
| <b>Section A: Welcome/introduction</b>                                                         |                            |                          |                          |                                                                                                            |                       |
| <b>Facilitator(s):</b>                                                                         |                            |                          |                          |                                                                                                            |                       |
| <b>Start time:</b>                                                                             |                            |                          |                          |                                                                                                            |                       |
| <b>End time:</b>                                                                               |                            |                          |                          |                                                                                                            |                       |
|                                                                                                | <b>Tick as appropriate</b> |                          |                          |                                                                                                            |                       |
|                                                                                                | <b>Present</b>             | <b>Absent</b>            | <b>Partially done</b>    | <b>If <i>partially done</i>, please provide reasons (e.g. ran out of time, forgot, deemed unnecessary)</b> | <b>Other comments</b> |
| <i>Content</i>                                                                                 |                            |                          |                          |                                                                                                            |                       |
| A1) Welcome/introductions (including housekeeping details, course handbook, course background) | <input type="checkbox"/>   | <input type="checkbox"/> | <input type="checkbox"/> |                                                                                                            |                       |
| A2) Introduction to the guidelines for working together as a group                             | <input type="checkbox"/>   | <input type="checkbox"/> | <input type="checkbox"/> |                                                                                                            |                       |
| A3) Opportunity for participants to ask questions                                              | <input type="checkbox"/>   | <input type="checkbox"/> | <input type="checkbox"/> |                                                                                                            |                       |
| A4) Introduction to communication aids                                                         | <input type="checkbox"/>   | <input type="checkbox"/> | <input type="checkbox"/> |                                                                                                            |                       |
| A5) Participants' important questions                                                          | <input type="checkbox"/>   | <input type="checkbox"/> | <input type="checkbox"/> |                                                                                                            |                       |
| <i>Materials</i>                                                                               |                            |                          |                          |                                                                                                            |                       |
| A6) Flipchart – names                                                                          | <input type="checkbox"/>   | <input type="checkbox"/> | <input type="checkbox"/> |                                                                                                            |                       |
| A7) Flipcharts – what would you like to get from the course?; what is your important question? | <input type="checkbox"/>   | <input type="checkbox"/> | <input type="checkbox"/> |                                                                                                            |                       |
| A8) Flipchart – working together as a group                                                    | <input type="checkbox"/>   | <input type="checkbox"/> | <input type="checkbox"/> |                                                                                                            |                       |
| <i>Key facilitator behaviours for welcome/introduction</i>                                     |                            |                          |                          |                                                                                                            |                       |
| A9) Uses and refers to participants' comments/quotes                                           | <input type="checkbox"/>   | <input type="checkbox"/> | <input type="checkbox"/> |                                                                                                            |                       |

v1.4

29/05/2019

| Section B: Stroke story                                                                                                                            |                          |                          |                          |                                                                                                      |                |
|----------------------------------------------------------------------------------------------------------------------------------------------------|--------------------------|--------------------------|--------------------------|------------------------------------------------------------------------------------------------------|----------------|
| Facilitator(s):                                                                                                                                    |                          |                          |                          |                                                                                                      |                |
| Start time:                                                                                                                                        |                          |                          |                          |                                                                                                      |                |
| End time:                                                                                                                                          |                          |                          |                          |                                                                                                      |                |
|                                                                                                                                                    | Tick as appropriate      |                          |                          |                                                                                                      |                |
|                                                                                                                                                    | Present                  | Absent                   | Partially done           | If <i>partially done</i> , please provide reasons (e.g. ran out of time, forgot, deemed unnecessary) | Other comments |
| <i>Content</i>                                                                                                                                     |                          |                          |                          |                                                                                                      |                |
| B1) Stroke story/introduction to narrative approach (including roadmap)                                                                            | <input type="checkbox"/> | <input type="checkbox"/> | <input type="checkbox"/> |                                                                                                      |                |
| B2) Eliciting skills, strengths and strategies from participants                                                                                   | <input type="checkbox"/> | <input type="checkbox"/> | <input type="checkbox"/> |                                                                                                      |                |
| <i>Materials</i>                                                                                                                                   |                          |                          |                          |                                                                                                      |                |
| B3) Flipchart – skills and strategies                                                                                                              | <input type="checkbox"/> | <input type="checkbox"/> | <input type="checkbox"/> |                                                                                                      |                |
| <i>Key facilitator behaviours for stroke story</i>                                                                                                 |                          |                          |                          |                                                                                                      |                |
| B4) Uses resources and/or participant handbooks appropriately to engage participants and enhance their understanding of the session's key outcomes | <input type="checkbox"/> | <input type="checkbox"/> | <input type="checkbox"/> |                                                                                                      |                |
| B5) Facilitates people to share their stories about attempts to manage their condition                                                             | <input type="checkbox"/> | <input type="checkbox"/> | <input type="checkbox"/> |                                                                                                      |                |
| B6) Appropriately adapts communication/environment/session delivery to meet the needs of the stroke survivors                                      | <input type="checkbox"/> | <input type="checkbox"/> | <input type="checkbox"/> |                                                                                                      |                |

| Section C: What is stroke?                                                                                                                         |                          |                          |                          |                                                                                                      |                |
|----------------------------------------------------------------------------------------------------------------------------------------------------|--------------------------|--------------------------|--------------------------|------------------------------------------------------------------------------------------------------|----------------|
| Facilitator(s):                                                                                                                                    |                          |                          |                          |                                                                                                      |                |
| Start time:                                                                                                                                        |                          |                          |                          |                                                                                                      |                |
| End time:                                                                                                                                          |                          |                          |                          |                                                                                                      |                |
|                                                                                                                                                    | Tick as appropriate      |                          |                          |                                                                                                      |                |
|                                                                                                                                                    | Present                  | Absent                   | Partially done           | If <i>partially done</i> , please provide reasons (e.g. ran out of time, forgot, deemed unnecessary) | Other comments |
| <i>Content</i>                                                                                                                                     |                          |                          |                          |                                                                                                      |                |
| C1) What is stroke (including impacts of stroke on individual – physically, emotionally, psychologically and socially)?                            | <input type="checkbox"/> | <input type="checkbox"/> | <input type="checkbox"/> |                                                                                                      |                |
| C2) Discussed neuroplasticity (the brain's ability to create new neural pathways and relearn skills)                                               | <input type="checkbox"/> | <input type="checkbox"/> | <input type="checkbox"/> |                                                                                                      |                |
| <i>Materials</i>                                                                                                                                   |                          |                          |                          |                                                                                                      |                |
| C3) Flipchart – body outline                                                                                                                       | <input type="checkbox"/> | <input type="checkbox"/> | <input type="checkbox"/> |                                                                                                      |                |
| C4) Record of 'what is stroke?' (i.e. written on body outline/sticky notes)                                                                        | <input type="checkbox"/> | <input type="checkbox"/> | <input type="checkbox"/> |                                                                                                      |                |
| C5) Record of 'effects of stroke on body/person' (i.e. written on body outline/sticky notes)                                                       | <input type="checkbox"/> | <input type="checkbox"/> | <input type="checkbox"/> |                                                                                                      |                |
| <i>Key facilitator behaviours for what is stroke</i>                                                                                               |                          |                          |                          |                                                                                                      |                |
| C6) Prompts participant to talk about their thoughts and explores misconceptions and gaps in knowledge                                             | <input type="checkbox"/> | <input type="checkbox"/> | <input type="checkbox"/> |                                                                                                      |                |
| C7) Uses resources and/or participant handbooks appropriately to engage participants and enhance their understanding of the session's key outcomes | <input type="checkbox"/> | <input type="checkbox"/> | <input type="checkbox"/> |                                                                                                      |                |

| <b>Section D: Stroke passenger</b>                                                                            |                          |                          |                          |                                                                                                      |                |  |
|---------------------------------------------------------------------------------------------------------------|--------------------------|--------------------------|--------------------------|------------------------------------------------------------------------------------------------------|----------------|--|
| <b>Facilitator(s):</b>                                                                                        |                          |                          |                          |                                                                                                      |                |  |
| <b>Start time:</b>                                                                                            |                          |                          |                          |                                                                                                      |                |  |
| <b>End time:</b>                                                                                              |                          |                          |                          |                                                                                                      |                |  |
|                                                                                                               | Tick as appropriate      |                          |                          |                                                                                                      |                |  |
|                                                                                                               | Present                  | Absent                   | Partially done           | If <i>partially done</i> , please provide reasons (e.g. ran out of time, forgot, deemed unnecessary) | Other comments |  |
| <i>Content</i>                                                                                                |                          |                          |                          |                                                                                                      |                |  |
| D1) Discussed 'Stroke passenger' analogy                                                                      | <input type="checkbox"/> | <input type="checkbox"/> | <input type="checkbox"/> |                                                                                                      |                |  |
| D2) Eliciting feelings and emotions about stroke                                                              | <input type="checkbox"/> | <input type="checkbox"/> | <input type="checkbox"/> |                                                                                                      |                |  |
| D3) Provided opportunity for separate carer/stroke survivor discussions                                       | <input type="checkbox"/> | <input type="checkbox"/> | <input type="checkbox"/> |                                                                                                      |                |  |
| D4) Discussing skills and coping strategies for living with stroke passenger                                  | <input type="checkbox"/> | <input type="checkbox"/> | <input type="checkbox"/> |                                                                                                      |                |  |
| <i>Materials</i>                                                                                              |                          |                          |                          |                                                                                                      |                |  |
| D5) Flipchart – how do you feel/think about sharing your life with stroke (carers)?                           | <input type="checkbox"/> | <input type="checkbox"/> | <input type="checkbox"/> |                                                                                                      |                |  |
| D6) Flipchart – how do you feel/think about sharing your life with stroke (stroke survivors)?                 | <input type="checkbox"/> | <input type="checkbox"/> | <input type="checkbox"/> |                                                                                                      |                |  |
| <i>Key facilitator behaviours for stroke passenger</i>                                                        |                          |                          |                          |                                                                                                      |                |  |
| D7) Prompts participants to express and explore their feelings about the condition or behaviour               | <input type="checkbox"/> | <input type="checkbox"/> | <input type="checkbox"/> |                                                                                                      |                |  |
| D8) Facilitates people to share their stories about attempts to manage their condition                        | <input type="checkbox"/> | <input type="checkbox"/> | <input type="checkbox"/> |                                                                                                      |                |  |
| D9) Appropriately adapts communication/environment/session delivery to meet the needs of the stroke survivors | <input type="checkbox"/> | <input type="checkbox"/> | <input type="checkbox"/> |                                                                                                      |                |  |
| D10) Works as a team with co-facilitator                                                                      | <input type="checkbox"/> | <input type="checkbox"/> | <input type="checkbox"/> |                                                                                                      |                |  |

v1.4

29/05/2019

| Section E: What will I do now?                                                                                                                     |                          |                          |                          |                                                                                                      |                |
|----------------------------------------------------------------------------------------------------------------------------------------------------|--------------------------|--------------------------|--------------------------|------------------------------------------------------------------------------------------------------|----------------|
| Facilitator(s):                                                                                                                                    |                          |                          |                          |                                                                                                      |                |
| Start time:                                                                                                                                        |                          |                          |                          |                                                                                                      |                |
| End time:                                                                                                                                          |                          |                          |                          |                                                                                                      |                |
|                                                                                                                                                    | Tick as appropriate      |                          |                          |                                                                                                      |                |
|                                                                                                                                                    | Present                  | Absent                   | Partially done           | If <i>partially done</i> , please provide reasons (e.g. ran out of time, forgot, deemed unnecessary) | Other comments |
| <i>Content</i>                                                                                                                                     |                          |                          |                          |                                                                                                      |                |
| E1) Session summary/recap of session key outcomes                                                                                                  | <input type="checkbox"/> | <input type="checkbox"/> | <input type="checkbox"/> |                                                                                                      |                |
| E2) 'What will I do now?' worksheet                                                                                                                | <input type="checkbox"/> | <input type="checkbox"/> | <input type="checkbox"/> |                                                                                                      |                |
| <i>Materials</i>                                                                                                                                   |                          |                          |                          |                                                                                                      |                |
| E3) 'What will I do now?' worksheet in handbook                                                                                                    | <input type="checkbox"/> | <input type="checkbox"/> | <input type="checkbox"/> |                                                                                                      |                |
| <i>Key facilitator behaviours for what will I do now</i>                                                                                           |                          |                          |                          |                                                                                                      |                |
| E4) Uses resources and/or participant handbooks appropriately to engage participants and enhance their understanding of the session's key outcomes | <input type="checkbox"/> | <input type="checkbox"/> | <input type="checkbox"/> |                                                                                                      |                |
| E5) Prompts group to summarise their key messages from the session.                                                                                | <input type="checkbox"/> | <input type="checkbox"/> | <input type="checkbox"/> |                                                                                                      |                |
| E6) Prompts participants to talk about what they are going to do as a result of the session.                                                       | <input type="checkbox"/> | <input type="checkbox"/> | <input type="checkbox"/> |                                                                                                      |                |

| Overall facilitator behaviours                                                                  |                          |                          |                          |                                                                                                      |                |
|-------------------------------------------------------------------------------------------------|--------------------------|--------------------------|--------------------------|------------------------------------------------------------------------------------------------------|----------------|
|                                                                                                 | Tick as appropriate      |                          |                          | If <i>partially done</i> , please provide reasons (e.g. ran out of time, forgot, deemed unnecessary) | Other comments |
|                                                                                                 | Present                  | Absent                   | Partially done           |                                                                                                      |                |
| 1. Uses non-judgmental statements in response to participants' verbal utterances                | <input type="checkbox"/> | <input type="checkbox"/> | <input type="checkbox"/> |                                                                                                      |                |
| 2. The facilitator seeks clarification of participants contribution                             | <input type="checkbox"/> | <input type="checkbox"/> | <input type="checkbox"/> |                                                                                                      |                |
| 3. Avoids giving their own opinion                                                              | <input type="checkbox"/> | <input type="checkbox"/> | <input type="checkbox"/> |                                                                                                      |                |
| 4. Encourages the group to discuss/answer their own question                                    | <input type="checkbox"/> | <input type="checkbox"/> | <input type="checkbox"/> |                                                                                                      |                |
| 5. Engages participants using rapport building skills                                           | <input type="checkbox"/> | <input type="checkbox"/> | <input type="checkbox"/> |                                                                                                      |                |
| 6. Notices tone/dynamics within the group, acknowledges these and uses them to manage the group | <input type="checkbox"/> | <input type="checkbox"/> | <input type="checkbox"/> |                                                                                                      |                |
| 7. The facilitator uses strategies to manage time within session                                | <input type="checkbox"/> | <input type="checkbox"/> | <input type="checkbox"/> |                                                                                                      |                |
| 8. Uses active listening skills and open body language to facilitate group/participant talk     | <input type="checkbox"/> | <input type="checkbox"/> | <input type="checkbox"/> |                                                                                                      |                |
| 9. Appropriately adapts delivery to meet the needs of the stroke survivors                      | <input type="checkbox"/> | <input type="checkbox"/> | <input type="checkbox"/> |                                                                                                      |                |
| 10. Works as a team with co-facilitator                                                         | <input type="checkbox"/> | <input type="checkbox"/> | <input type="checkbox"/> |                                                                                                      |                |

Assessor comments/notes

v1.4

29/05/2019

|                                                                                                                                           |                            |                          |                          |                                                                                                     |                       |
|-------------------------------------------------------------------------------------------------------------------------------------------|----------------------------|--------------------------|--------------------------|-----------------------------------------------------------------------------------------------------|-----------------------|
| <b>Assessor's name:</b>                                                                                                                   |                            |                          |                          |                                                                                                     |                       |
| <b>Group/facilitator ID:</b>                                                                                                              |                            |                          |                          |                                                                                                     |                       |
| <b>Date:</b>                                                                                                                              |                            |                          |                          |                                                                                                     |                       |
| <b>Week 2/3 (circle as appropriate): Managing health and wellbeing (2.5 hours, with breaks)</b>                                           |                            |                          |                          |                                                                                                     |                       |
| <b>Section A: Welcome back [20 mins]</b>                                                                                                  |                            |                          |                          |                                                                                                     |                       |
| <b>Facilitator(s):</b>                                                                                                                    |                            |                          |                          |                                                                                                     |                       |
| <b>Start time:</b>                                                                                                                        |                            |                          |                          |                                                                                                     |                       |
| <b>End time:</b>                                                                                                                          |                            |                          |                          |                                                                                                     |                       |
|                                                                                                                                           | <b>Tick as appropriate</b> |                          |                          |                                                                                                     |                       |
|                                                                                                                                           | <b>Present</b>             | <b>Absent</b>            | <b>Partially done</b>    | <b>If partially done, please provide reasons (e.g. ran out of time, forgot, deemed unnecessary)</b> | <b>Other comments</b> |
| <b>Content</b>                                                                                                                            |                            |                          |                          |                                                                                                     |                       |
| A1) Welcome (including housekeeping details, and ground rules)                                                                            | <input type="checkbox"/>   | <input type="checkbox"/> | <input type="checkbox"/> |                                                                                                     |                       |
| A2) Session outline                                                                                                                       | <input type="checkbox"/>   | <input type="checkbox"/> | <input type="checkbox"/> |                                                                                                     |                       |
| A3) Introduction/recap of managing health and wellbeing handbook and roadmap <u>or</u> roadblocks handbook and roadmap                    | <input type="checkbox"/>   | <input type="checkbox"/> | <input type="checkbox"/> |                                                                                                     |                       |
| A4) Previous week's worksheets; stories and reflections from past week                                                                    | <input type="checkbox"/>   | <input type="checkbox"/> | <input type="checkbox"/> |                                                                                                     |                       |
| A5) Opportunity for participants to ask questions                                                                                         | <input type="checkbox"/>   | <input type="checkbox"/> | <input type="checkbox"/> |                                                                                                     |                       |
| <b>Materials</b>                                                                                                                          |                            |                          |                          |                                                                                                     |                       |
| A6) Roadmap                                                                                                                               | <input type="checkbox"/>   | <input type="checkbox"/> | <input type="checkbox"/> |                                                                                                     |                       |
| A7) Previous week's (relevant) flipcharts on view                                                                                         | <input type="checkbox"/>   | <input type="checkbox"/> | <input type="checkbox"/> |                                                                                                     |                       |
| <b>Key facilitator behaviours for welcome</b>                                                                                             |                            |                          |                          |                                                                                                     |                       |
| A8) Uses resources and participant handbooks appropriately to engage participants and enhance understanding of the session's key outcomes | <input type="checkbox"/>   | <input type="checkbox"/> | <input type="checkbox"/> |                                                                                                     |                       |
| A9) Prompts the participants to reflect on last week's session and activities                                                             | <input type="checkbox"/>   | <input type="checkbox"/> | <input type="checkbox"/> |                                                                                                     |                       |

v1.4

29/05/2019



| <b>Section B: Managing health and wellbeing [40 mins]</b>                                                                                 |                          |                          |                          |                                                                                                      |                |
|-------------------------------------------------------------------------------------------------------------------------------------------|--------------------------|--------------------------|--------------------------|------------------------------------------------------------------------------------------------------|----------------|
| <b>Facilitator(s):</b>                                                                                                                    |                          |                          |                          |                                                                                                      |                |
| <b>Start time:</b>                                                                                                                        |                          |                          |                          |                                                                                                      |                |
| <b>End time:</b>                                                                                                                          |                          |                          |                          |                                                                                                      |                |
|                                                                                                                                           | Tick as appropriate      |                          |                          | If <i>partially done</i> , please provide reasons (e.g. ran out of time, forgot, deemed unnecessary) | Other comments |
|                                                                                                                                           | Present                  | Absent                   | Partially done           |                                                                                                      |                |
| <i>Content</i>                                                                                                                            |                          |                          |                          |                                                                                                      |                |
| B1) Risk factors for stroke                                                                                                               | <input type="checkbox"/> | <input type="checkbox"/> | <input type="checkbox"/> |                                                                                                      |                |
| B2) Ways to manage health and wellbeing                                                                                                   | <input type="checkbox"/> | <input type="checkbox"/> | <input type="checkbox"/> |                                                                                                      |                |
| <i>Materials</i>                                                                                                                          |                          |                          |                          |                                                                                                      |                |
| B3) A6 headings: 'risks I can change' and 'risks I cannot change'                                                                         | <input type="checkbox"/> | <input type="checkbox"/> | <input type="checkbox"/> |                                                                                                      |                |
| B4) A6 images: risk factors                                                                                                               | <input type="checkbox"/> | <input type="checkbox"/> | <input type="checkbox"/> |                                                                                                      |                |
| B5) A4 headings: health and wellbeing                                                                                                     | <input type="checkbox"/> | <input type="checkbox"/> | <input type="checkbox"/> |                                                                                                      |                |
| B6) A6 images: health and wellbeing                                                                                                       | <input type="checkbox"/> | <input type="checkbox"/> | <input type="checkbox"/> |                                                                                                      |                |
| <i>Key facilitator behaviours for managing health and wellbeing</i>                                                                       |                          |                          |                          |                                                                                                      |                |
| B7) Facilitates people to share their stories about attempts to manage their condition                                                    | <input type="checkbox"/> | <input type="checkbox"/> | <input type="checkbox"/> |                                                                                                      |                |
| B8) Uses resources and participant handbooks appropriately to engage participants and enhance understanding of the session's key outcomes | <input type="checkbox"/> | <input type="checkbox"/> | <input type="checkbox"/> |                                                                                                      |                |
| B9) Prompts participant to talk about their thoughts and explores misconceptions and gaps in knowledge                                    | <input type="checkbox"/> | <input type="checkbox"/> | <input type="checkbox"/> |                                                                                                      |                |
| B10) Encourages the group to discuss/answer their own questions                                                                           | <input type="checkbox"/> | <input type="checkbox"/> | <input type="checkbox"/> |                                                                                                      |                |
| B11) Works as a team with co-facilitator                                                                                                  | <input type="checkbox"/> | <input type="checkbox"/> | <input type="checkbox"/> |                                                                                                      |                |

| Section C: Making changes [15 mins]                                                                       |                          |                          |                          |                                                                                                      |                |
|-----------------------------------------------------------------------------------------------------------|--------------------------|--------------------------|--------------------------|------------------------------------------------------------------------------------------------------|----------------|
| Facilitator(s):                                                                                           |                          |                          |                          |                                                                                                      |                |
| Start time:                                                                                               |                          |                          |                          |                                                                                                      |                |
| End time:                                                                                                 |                          |                          |                          |                                                                                                      |                |
|                                                                                                           | Tick as appropriate      |                          |                          | If <i>partially done</i> , please provide reasons (e.g. ran out of time, forgot, deemed unnecessary) | Other comments |
|                                                                                                           | Present                  | Absent                   | Partially done           |                                                                                                      |                |
| <i>Content</i>                                                                                            |                          |                          |                          |                                                                                                      |                |
| C1) Elicits feelings and reactions to change                                                              | <input type="checkbox"/> | <input type="checkbox"/> | <input type="checkbox"/> |                                                                                                      |                |
| C2) Discussion of pros and cons of changes                                                                | <input type="checkbox"/> | <input type="checkbox"/> | <input type="checkbox"/> |                                                                                                      |                |
| <i>Materials</i>                                                                                          |                          |                          |                          |                                                                                                      |                |
| C3) Flipchart – pros and cons grid                                                                        | <input type="checkbox"/> | <input type="checkbox"/> | <input type="checkbox"/> |                                                                                                      |                |
| <i>Key facilitator behaviours for making changes</i>                                                      |                          |                          |                          |                                                                                                      |                |
| C4) Prompts participants to discuss their thoughts about possible changes to self-management.             | <input type="checkbox"/> | <input type="checkbox"/> | <input type="checkbox"/> |                                                                                                      |                |
| C5) Prompts participants to review the impact of possible choices on their future health.                 | <input type="checkbox"/> | <input type="checkbox"/> | <input type="checkbox"/> |                                                                                                      |                |
| C6) Prompts or allows participants to express and explore their feelings about the condition or behaviour | <input type="checkbox"/> | <input type="checkbox"/> | <input type="checkbox"/> |                                                                                                      |                |

| <b>Section D: Making a plan [35 mins]</b>                                                                                                             |                          |                          |                          |                                                                                                      |                |
|-------------------------------------------------------------------------------------------------------------------------------------------------------|--------------------------|--------------------------|--------------------------|------------------------------------------------------------------------------------------------------|----------------|
| <b>Facilitator(s):</b>                                                                                                                                |                          |                          |                          |                                                                                                      |                |
| <b>Start time:</b>                                                                                                                                    |                          |                          |                          |                                                                                                      |                |
| <b>End time:</b>                                                                                                                                      |                          |                          |                          |                                                                                                      |                |
|                                                                                                                                                       | Tick as appropriate      |                          |                          | If <i>partially done</i> , please provide reasons (e.g. ran out of time, forgot, deemed unnecessary) | Other comments |
|                                                                                                                                                       | Present                  | Absent                   | Partially done           |                                                                                                      |                |
| <i>Content</i>                                                                                                                                        |                          |                          |                          |                                                                                                      |                |
| D1) Identifying challenges to planning, problem-solving                                                                                               | <input type="checkbox"/> | <input type="checkbox"/> | <input type="checkbox"/> |                                                                                                      |                |
| D2) Making a SMART plan                                                                                                                               | <input type="checkbox"/> | <input type="checkbox"/> | <input type="checkbox"/> |                                                                                                      |                |
| <i>Materials</i>                                                                                                                                      |                          |                          |                          |                                                                                                      |                |
| D3) A4 resource: 'My action plan'                                                                                                                     | <input type="checkbox"/> | <input type="checkbox"/> | <input type="checkbox"/> |                                                                                                      |                |
| D4) 'My action plan' in handbook                                                                                                                      | <input type="checkbox"/> | <input type="checkbox"/> | <input type="checkbox"/> |                                                                                                      |                |
| <i>Key facilitator behaviours for making a plan</i>                                                                                                   |                          |                          |                          |                                                                                                      |                |
| D5) Prompts participants to discuss their thoughts about possible changes to self-management.                                                         | <input type="checkbox"/> | <input type="checkbox"/> | <input type="checkbox"/> |                                                                                                      |                |
| D6) Prompts the participants to reflect on their goals/plans                                                                                          | <input type="checkbox"/> | <input type="checkbox"/> | <input type="checkbox"/> |                                                                                                      |                |
| D7) Prompts the individual or group to problem solve possible barriers to change (e.g. their desired changes or possible barriers to self-management) | <input type="checkbox"/> | <input type="checkbox"/> | <input type="checkbox"/> |                                                                                                      |                |
| D8) Encourages the group to discuss/answer their own questions                                                                                        | <input type="checkbox"/> | <input type="checkbox"/> | <input type="checkbox"/> |                                                                                                      |                |
| D9) Prompts group to summarise key messages from the session                                                                                          | <input type="checkbox"/> | <input type="checkbox"/> | <input type="checkbox"/> |                                                                                                      |                |

| Section E: What will I do now? [10 mins]                                                                                                  |                          |                          |                          |                                                                                                      |                |
|-------------------------------------------------------------------------------------------------------------------------------------------|--------------------------|--------------------------|--------------------------|------------------------------------------------------------------------------------------------------|----------------|
| Facilitator(s):                                                                                                                           |                          |                          |                          |                                                                                                      |                |
| Start time:                                                                                                                               |                          |                          |                          |                                                                                                      |                |
| End time:                                                                                                                                 |                          |                          |                          |                                                                                                      |                |
|                                                                                                                                           | Tick as appropriate      |                          |                          | If <i>partially done</i> , please provide reasons (e.g. ran out of time, forgot, deemed unnecessary) | Other comments |
|                                                                                                                                           | Present                  | Absent                   | Partially done           |                                                                                                      |                |
| <i>Content</i>                                                                                                                            |                          |                          |                          |                                                                                                      |                |
| E1) Session summary provided                                                                                                              | <input type="checkbox"/> | <input type="checkbox"/> | <input type="checkbox"/> |                                                                                                      |                |
| E2) 'What will I do now?' worksheet                                                                                                       | <input type="checkbox"/> | <input type="checkbox"/> | <input type="checkbox"/> |                                                                                                      |                |
| <i>Materials</i>                                                                                                                          |                          |                          |                          |                                                                                                      |                |
| E3) 'What will I do now?' worksheet in handbook                                                                                           | <input type="checkbox"/> | <input type="checkbox"/> | <input type="checkbox"/> |                                                                                                      |                |
| <i>Key facilitator behaviours for what will I do now</i>                                                                                  |                          |                          |                          |                                                                                                      |                |
| E4) Uses resources and participant handbooks appropriately to engage participants and enhance understanding of the session's key outcomes | <input type="checkbox"/> | <input type="checkbox"/> | <input type="checkbox"/> |                                                                                                      |                |
| E5) Prompts participants to talk about what they are going to do as a result of the session                                               | <input type="checkbox"/> | <input type="checkbox"/> | <input type="checkbox"/> |                                                                                                      |                |
| E6) Prompts group to summarise their key messages from the session.                                                                       | <input type="checkbox"/> | <input type="checkbox"/> | <input type="checkbox"/> |                                                                                                      |                |

| Overall facilitator behaviours                                                                                        |                          |                          |                          |                                                                                                      |                |
|-----------------------------------------------------------------------------------------------------------------------|--------------------------|--------------------------|--------------------------|------------------------------------------------------------------------------------------------------|----------------|
|                                                                                                                       | Tick as appropriate      |                          |                          | If <i>partially done</i> , please provide reasons (e.g. ran out of time, forgot, deemed unnecessary) | Other comments |
|                                                                                                                       | Present                  | Absent                   | Partially done           |                                                                                                      |                |
| 1. Uses non-judgmental statements in response to participants' verbal utterances                                      | <input type="checkbox"/> | <input type="checkbox"/> | <input type="checkbox"/> |                                                                                                      |                |
| 2. The facilitator seeks clarification of participants contribution                                                   | <input type="checkbox"/> | <input type="checkbox"/> | <input type="checkbox"/> |                                                                                                      |                |
| 3. Avoids giving their own opinion                                                                                    | <input type="checkbox"/> | <input type="checkbox"/> | <input type="checkbox"/> |                                                                                                      |                |
| 4. Encourages the group to discuss/answer their own questions and/or elicits suggestions from participants            | <input type="checkbox"/> | <input type="checkbox"/> | <input type="checkbox"/> |                                                                                                      |                |
| 5. Engages participants using rapport building skills                                                                 | <input type="checkbox"/> | <input type="checkbox"/> | <input type="checkbox"/> |                                                                                                      |                |
| 6. Notices tone/dynamics within the group, acknowledges these and uses them to manage the group                       | <input type="checkbox"/> | <input type="checkbox"/> | <input type="checkbox"/> |                                                                                                      |                |
| 7. The facilitator uses strategies to manage time within session                                                      | <input type="checkbox"/> | <input type="checkbox"/> | <input type="checkbox"/> |                                                                                                      |                |
| 8. Uses open questions, reflections, appropriate silences and open body language to facilitate group/participant talk | <input type="checkbox"/> | <input type="checkbox"/> | <input type="checkbox"/> |                                                                                                      |                |
| 9. Adapts communication/environment/ session delivery to meet the needs of the stroke survivors                       | <input type="checkbox"/> | <input type="checkbox"/> | <input type="checkbox"/> |                                                                                                      |                |
| 10. Works as a team with co-facilitator                                                                               | <input type="checkbox"/> | <input type="checkbox"/> | <input type="checkbox"/> |                                                                                                      |                |

Assessor comments/notes

v1.4

29/05/2019

|                                                                                                                                           |                            |                          |                          |                                                                                                            |                       |
|-------------------------------------------------------------------------------------------------------------------------------------------|----------------------------|--------------------------|--------------------------|------------------------------------------------------------------------------------------------------------|-----------------------|
| <b>Assessor's name:</b>                                                                                                                   |                            |                          |                          |                                                                                                            |                       |
| <b>Group/facilitator ID:</b>                                                                                                              |                            |                          |                          |                                                                                                            |                       |
| <b>Date:</b>                                                                                                                              |                            |                          |                          |                                                                                                            |                       |
| Week 2/3 (circle as appropriate): Roadblocks (2.5 hrs, with breaks)                                                                       |                            |                          |                          |                                                                                                            |                       |
| <b>Section A: Welcome back</b>                                                                                                            |                            |                          |                          |                                                                                                            |                       |
| <b>Facilitator(s):</b>                                                                                                                    |                            |                          |                          |                                                                                                            |                       |
| <b>Start time:</b>                                                                                                                        |                            |                          |                          |                                                                                                            |                       |
| <b>End time:</b>                                                                                                                          |                            |                          |                          |                                                                                                            |                       |
|                                                                                                                                           | <b>Tick as appropriate</b> |                          |                          |                                                                                                            |                       |
|                                                                                                                                           | <b>Present</b>             | <b>Absent</b>            | <b>Partially done</b>    | <b>If <i>partially done</i>, please provide reasons (e.g. ran out of time, forgot, deemed unnecessary)</b> | <b>Other comments</b> |
| <i>Content</i>                                                                                                                            |                            |                          |                          |                                                                                                            |                       |
| A1) Welcome (including housekeeping details, and ground rules)                                                                            | <input type="checkbox"/>   | <input type="checkbox"/> | <input type="checkbox"/> |                                                                                                            |                       |
| A2) Session outline                                                                                                                       | <input type="checkbox"/>   | <input type="checkbox"/> | <input type="checkbox"/> |                                                                                                            |                       |
| A3) Introduction/recap of managing health and wellbeing handbook and roadmap <u>or</u> roadblocks handbook and roadmap                    | <input type="checkbox"/>   | <input type="checkbox"/> | <input type="checkbox"/> |                                                                                                            |                       |
| A4) Previous week's worksheets; stories and reflections from past week                                                                    | <input type="checkbox"/>   | <input type="checkbox"/> | <input type="checkbox"/> |                                                                                                            |                       |
| A5) Opportunity for participants to ask questions                                                                                         |                            |                          |                          |                                                                                                            |                       |
| <i>Materials</i>                                                                                                                          |                            |                          |                          |                                                                                                            |                       |
| A6) Roadmap                                                                                                                               | <input type="checkbox"/>   | <input type="checkbox"/> | <input type="checkbox"/> |                                                                                                            |                       |
| A7) Previous week's (relevant) flipcharts on view                                                                                         | <input type="checkbox"/>   | <input type="checkbox"/> | <input type="checkbox"/> |                                                                                                            |                       |
| <i>Key facilitator behaviours for welcome back</i>                                                                                        |                            |                          |                          |                                                                                                            |                       |
| A8) Uses resources and participant handbooks appropriately to engage participants and enhance understanding of the session's key outcomes | <input type="checkbox"/>   | <input type="checkbox"/> | <input type="checkbox"/> |                                                                                                            |                       |
| A9) Prompts the participants to reflect on last week's session and activities                                                             | <input type="checkbox"/>   | <input type="checkbox"/> | <input type="checkbox"/> |                                                                                                            |                       |

v1.4

29/05/2019

| Section B: Roadblocks on my journey                                                                                                      |                          |                          |                          |                                                                                                      |                |
|------------------------------------------------------------------------------------------------------------------------------------------|--------------------------|--------------------------|--------------------------|------------------------------------------------------------------------------------------------------|----------------|
| Facilitator(s):                                                                                                                          |                          |                          |                          |                                                                                                      |                |
| Start time:                                                                                                                              |                          |                          |                          |                                                                                                      |                |
| End time:                                                                                                                                |                          |                          |                          |                                                                                                      |                |
|                                                                                                                                          | Tick as appropriate      |                          |                          | If <i>partially done</i> , please provide reasons (e.g. ran out of time, forgot, deemed unnecessary) | Other comments |
|                                                                                                                                          | Present                  | Absent                   | Partially done           |                                                                                                      |                |
| <i>Content</i>                                                                                                                           |                          |                          |                          |                                                                                                      |                |
| B1) Fictional character facing loss of confidence after stroke (using STOP sign)                                                         | <input type="checkbox"/> | <input type="checkbox"/> | <input type="checkbox"/> |                                                                                                      |                |
| B2) Eliciting thoughts, feelings, sensations, or behaviours as a response to loss of confidence                                          | <input type="checkbox"/> | <input type="checkbox"/> | <input type="checkbox"/> |                                                                                                      |                |
| B3) Discuss what might help the fictional character, and impact of this on thoughts, feelings, sensations, or behaviours (using GO sign) | <input type="checkbox"/> | <input type="checkbox"/> | <input type="checkbox"/> |                                                                                                      |                |
| B4) 'What do my roadblocks look like?' worksheet                                                                                         | <input type="checkbox"/> | <input type="checkbox"/> | <input type="checkbox"/> |                                                                                                      |                |
| <i>Materials</i>                                                                                                                         |                          |                          |                          |                                                                                                      |                |
| B5) Roadmap                                                                                                                              | <input type="checkbox"/> | <input type="checkbox"/> | <input type="checkbox"/> |                                                                                                      |                |
| B6) Flipcharts – STOP and GO                                                                                                             | <input type="checkbox"/> | <input type="checkbox"/> | <input type="checkbox"/> |                                                                                                      |                |



| <i>Key facilitator behaviours for roadblocks</i>                                                                                                       |                          |                          |                          |                                                                                                      |                |
|--------------------------------------------------------------------------------------------------------------------------------------------------------|--------------------------|--------------------------|--------------------------|------------------------------------------------------------------------------------------------------|----------------|
|                                                                                                                                                        | Tick as appropriate      |                          |                          | If <i>partially done</i> , please provide reasons (e.g. ran out of time, forgot, deemed unnecessary) | Other comments |
|                                                                                                                                                        | Present                  | Absent                   | Partially done           |                                                                                                      |                |
| B7) Facilitates people to share their stories about attempts to manage their condition, and the challenges/roadblocks they face.                       | <input type="checkbox"/> | <input type="checkbox"/> | <input type="checkbox"/> |                                                                                                      |                |
| B8) Prompts or allows participants to express and explore their feelings about (the condition or behaviour) during the session                         | <input type="checkbox"/> | <input type="checkbox"/> | <input type="checkbox"/> |                                                                                                      |                |
| B9) Encourages the group to discuss/answer their own questions                                                                                         | <input type="checkbox"/> | <input type="checkbox"/> | <input type="checkbox"/> |                                                                                                      |                |
| B10) Uses and refers to participants' comments/quotes                                                                                                  | <input type="checkbox"/> | <input type="checkbox"/> | <input type="checkbox"/> |                                                                                                      |                |
| B11) Prompts the individual or group to problem solve possible barriers to change (e.g. their desired changes or possible barriers to self-management) | <input type="checkbox"/> | <input type="checkbox"/> | <input type="checkbox"/> |                                                                                                      |                |
| B12) Prompts participants to review the impact of possible choices on their future health.                                                             | <input type="checkbox"/> | <input type="checkbox"/> | <input type="checkbox"/> |                                                                                                      |                |

| Section C: Working it out                                                                                                                                               |                          |                          |                          |                                                                                                      |                |
|-------------------------------------------------------------------------------------------------------------------------------------------------------------------------|--------------------------|--------------------------|--------------------------|------------------------------------------------------------------------------------------------------|----------------|
| Facilitator(s):                                                                                                                                                         |                          |                          |                          |                                                                                                      |                |
| Start time:                                                                                                                                                             |                          |                          |                          |                                                                                                      |                |
| End time:                                                                                                                                                               |                          |                          |                          |                                                                                                      |                |
|                                                                                                                                                                         | Tick as appropriate      |                          |                          | If <i>partially done</i> , please provide reasons (e.g. ran out of time, forgot, deemed unnecessary) | Other comments |
|                                                                                                                                                                         | Present                  | Absent                   | Partially done           |                                                                                                      |                |
| <i>Content</i>                                                                                                                                                          |                          |                          |                          |                                                                                                      |                |
| C1) Problems stroke survivors could face Next steps (including session's key outcomes, 'what will I do now?' worksheet, and follow-up appointments)                     | <input type="checkbox"/> | <input type="checkbox"/> | <input type="checkbox"/> |                                                                                                      |                |
| C2) Introduce problem-solving approach                                                                                                                                  | <input type="checkbox"/> | <input type="checkbox"/> | <input type="checkbox"/> |                                                                                                      |                |
| C3) Use fictional character to choose a problem and apply problem-solving approach                                                                                      | <input type="checkbox"/> | <input type="checkbox"/> | <input type="checkbox"/> |                                                                                                      |                |
| C4) How decisions may be made on the best course of action for solving the problem                                                                                      | <input type="checkbox"/> | <input type="checkbox"/> | <input type="checkbox"/> |                                                                                                      |                |
| C5) What to do when problems aren't solvable now                                                                                                                        | <input type="checkbox"/> | <input type="checkbox"/> | <input type="checkbox"/> |                                                                                                      |                |
| C6) 'Working it out' worksheet                                                                                                                                          | <input type="checkbox"/> | <input type="checkbox"/> | <input type="checkbox"/> |                                                                                                      |                |
| <i>Materials</i>                                                                                                                                                        |                          |                          |                          |                                                                                                      |                |
| C7) Flipcharts with headings: 1) in my power to solve/change or not in my power to solve/change; 2) 'what could help'; 3) solution: immediate results/long-term results | <input type="checkbox"/> | <input type="checkbox"/> | <input type="checkbox"/> |                                                                                                      |                |
| C8) Previous flipcharts (e.g. what are my roadblocks; skills and strategies toolkit)                                                                                    | <input type="checkbox"/> | <input type="checkbox"/> | <input type="checkbox"/> |                                                                                                      |                |

| <i>Key facilitator behaviours for working it out</i>                                                                                                   |                          |                          |                          |                                                                                                      |                |
|--------------------------------------------------------------------------------------------------------------------------------------------------------|--------------------------|--------------------------|--------------------------|------------------------------------------------------------------------------------------------------|----------------|
|                                                                                                                                                        | Tick as appropriate      |                          |                          | If <i>partially done</i> , please provide reasons (e.g. ran out of time, forgot, deemed unnecessary) | Other comments |
|                                                                                                                                                        | Present                  | Absent                   | Partially done           |                                                                                                      |                |
| C9) Uses resources and participant handbooks appropriately to engage participants and enhance understanding of the session's key outcomes              | <input type="checkbox"/> | <input type="checkbox"/> | <input type="checkbox"/> |                                                                                                      |                |
| C10) Uses and refers to participants' comments/quotes                                                                                                  | <input type="checkbox"/> | <input type="checkbox"/> | <input type="checkbox"/> |                                                                                                      |                |
| C11) Prompts participants to discuss their thoughts about possible changes to self-management.                                                         | <input type="checkbox"/> | <input type="checkbox"/> | <input type="checkbox"/> |                                                                                                      |                |
| C12) Prompts participants to review the impact of possible choices on their future health.                                                             | <input type="checkbox"/> | <input type="checkbox"/> | <input type="checkbox"/> |                                                                                                      |                |
| C13) Prompts the individual or group to problem solve possible barriers to change (e.g. their desired changes or possible barriers to self-management) | <input type="checkbox"/> | <input type="checkbox"/> | <input type="checkbox"/> |                                                                                                      |                |

| Section D: What will I do now                                                                                                             |                          |                          |                          |                                                                                                      |                |
|-------------------------------------------------------------------------------------------------------------------------------------------|--------------------------|--------------------------|--------------------------|------------------------------------------------------------------------------------------------------|----------------|
| Facilitator(s):                                                                                                                           |                          |                          |                          |                                                                                                      |                |
| Start time:                                                                                                                               |                          |                          |                          |                                                                                                      |                |
| End time:                                                                                                                                 |                          |                          |                          |                                                                                                      |                |
|                                                                                                                                           | Tick as appropriate      |                          |                          | If <i>partially done</i> , please provide reasons (e.g. ran out of time, forgot, deemed unnecessary) | Other comments |
|                                                                                                                                           | Present                  | Absent                   | Partially done           |                                                                                                      |                |
| <i>Content</i>                                                                                                                            |                          |                          |                          |                                                                                                      |                |
| D1) Recap key outcomes                                                                                                                    | <input type="checkbox"/> | <input type="checkbox"/> | <input type="checkbox"/> |                                                                                                      |                |
| D2) 'What will I do now?' worksheet                                                                                                       | <input type="checkbox"/> | <input type="checkbox"/> | <input type="checkbox"/> |                                                                                                      |                |
| <i>Materials</i>                                                                                                                          |                          |                          |                          |                                                                                                      |                |
| D3) 'What will I do now?' worksheet                                                                                                       | <input type="checkbox"/> | <input type="checkbox"/> | <input type="checkbox"/> |                                                                                                      |                |
| <i>Key facilitator behaviours for what will I do now</i>                                                                                  |                          |                          |                          |                                                                                                      |                |
| D4) Uses resources and participant handbooks appropriately to engage participants and enhance understanding of the session's key outcomes | <input type="checkbox"/> | <input type="checkbox"/> | <input type="checkbox"/> |                                                                                                      |                |
| D5) Prompts participants to talk about what they are going to do as a result of the session.                                              | <input type="checkbox"/> | <input type="checkbox"/> | <input type="checkbox"/> |                                                                                                      |                |

| Overall facilitator behaviours                                                                                        |                          |                          |                          |                                                                                                      |                |
|-----------------------------------------------------------------------------------------------------------------------|--------------------------|--------------------------|--------------------------|------------------------------------------------------------------------------------------------------|----------------|
|                                                                                                                       | Tick as appropriate      |                          |                          | If <i>partially done</i> , please provide reasons (e.g. ran out of time, forgot, deemed unnecessary) | Other comments |
|                                                                                                                       | Present                  | Absent                   | Partially done           |                                                                                                      |                |
| 1. Prompts group to summarise their key messages from the session.                                                    | <input type="checkbox"/> | <input type="checkbox"/> | <input type="checkbox"/> |                                                                                                      |                |
| 2. The facilitator seeks clarification of participants contribution                                                   | <input type="checkbox"/> | <input type="checkbox"/> | <input type="checkbox"/> |                                                                                                      |                |
| 3. Avoids giving their own opinion                                                                                    | <input type="checkbox"/> | <input type="checkbox"/> | <input type="checkbox"/> |                                                                                                      |                |
| 4. Encourages the group to discuss/answer their own questions and/or elicits suggestions from participants            | <input type="checkbox"/> | <input type="checkbox"/> | <input type="checkbox"/> |                                                                                                      |                |
| 5. Engages participants using rapport building skills                                                                 | <input type="checkbox"/> | <input type="checkbox"/> | <input type="checkbox"/> |                                                                                                      |                |
| 6. Notices tone/dynamics within the group, acknowledges these and uses them to manage the group                       | <input type="checkbox"/> | <input type="checkbox"/> | <input type="checkbox"/> |                                                                                                      |                |
| 7. The facilitator uses strategies to manage time within session                                                      | <input type="checkbox"/> | <input type="checkbox"/> | <input type="checkbox"/> |                                                                                                      |                |
| 8. Uses open questions, reflections, appropriate silences and open body language to facilitate group/participant talk | <input type="checkbox"/> | <input type="checkbox"/> | <input type="checkbox"/> |                                                                                                      |                |
| 9. Adapts communication/environment/ session delivery to meet the needs of the stroke survivors                       | <input type="checkbox"/> | <input type="checkbox"/> | <input type="checkbox"/> |                                                                                                      |                |
| 10. Works as a team with co-facilitator                                                                               | <input type="checkbox"/> | <input type="checkbox"/> | <input type="checkbox"/> |                                                                                                      |                |

Assessor comments/notes

v1.4

29/05/2019

|                                                                               |                            |                          |                          |                                                                                                            |                       |
|-------------------------------------------------------------------------------|----------------------------|--------------------------|--------------------------|------------------------------------------------------------------------------------------------------------|-----------------------|
| <b>Assessor's name:</b>                                                       |                            |                          |                          |                                                                                                            |                       |
| <b>Group/facilitator ID:</b>                                                  |                            |                          |                          |                                                                                                            |                       |
| <b>Date:</b>                                                                  |                            |                          |                          |                                                                                                            |                       |
| <b>Week 4: Moving forward on my journey (2.5 hours, with breaks)</b>          |                            |                          |                          |                                                                                                            |                       |
| <b>Section A: Welcome back</b>                                                |                            |                          |                          |                                                                                                            |                       |
| <b>Facilitator(s):</b>                                                        |                            |                          |                          |                                                                                                            |                       |
| <b>Start time:</b>                                                            |                            |                          |                          |                                                                                                            |                       |
| <b>End time:</b>                                                              |                            |                          |                          |                                                                                                            |                       |
|                                                                               | <b>Tick as appropriate</b> |                          |                          |                                                                                                            |                       |
|                                                                               | <b>Present</b>             | <b>Absent</b>            | <b>Partially done</b>    | <b>If <i>partially done</i>, please provide reasons (e.g. ran out of time, forgot, deemed unnecessary)</b> | <b>Other comments</b> |
| <i>Content</i>                                                                |                            |                          |                          |                                                                                                            |                       |
| A1) Welcome (including housekeeping details, handbook and ground rules)       | <input type="checkbox"/>   | <input type="checkbox"/> | <input type="checkbox"/> |                                                                                                            |                       |
| A2) Session outline                                                           | <input type="checkbox"/>   | <input type="checkbox"/> | <input type="checkbox"/> |                                                                                                            |                       |
| A3) Previous week's action plan/working it out worksheets                     | <input type="checkbox"/>   | <input type="checkbox"/> | <input type="checkbox"/> |                                                                                                            |                       |
| A4) Recap roadmap                                                             | <input type="checkbox"/>   | <input type="checkbox"/> | <input type="checkbox"/> |                                                                                                            |                       |
| <i>Materials</i>                                                              |                            |                          |                          |                                                                                                            |                       |
| A5) Roadmap                                                                   | <input type="checkbox"/>   | <input type="checkbox"/> | <input type="checkbox"/> |                                                                                                            |                       |
| A6) Previous week's (relevant) flipcharts on view                             | <input type="checkbox"/>   | <input type="checkbox"/> | <input type="checkbox"/> |                                                                                                            |                       |
| A7) Moving forward on my journey handbook                                     | <input type="checkbox"/>   | <input type="checkbox"/> | <input type="checkbox"/> |                                                                                                            |                       |
| <i>Key facilitator behaviours for welcome back</i>                            |                            |                          |                          |                                                                                                            |                       |
| A8) Re-engages participants in the journey analogy and resources              | <input type="checkbox"/>   | <input type="checkbox"/> | <input type="checkbox"/> |                                                                                                            |                       |
| A9) Prompts the participants to reflect on last week's session and activities | <input type="checkbox"/>   | <input type="checkbox"/> | <input type="checkbox"/> |                                                                                                            |                       |

| Section B: Your relationships                                                                                      |                          |                          |                          |                                                                                                      |                |
|--------------------------------------------------------------------------------------------------------------------|--------------------------|--------------------------|--------------------------|------------------------------------------------------------------------------------------------------|----------------|
| Facilitator(s):                                                                                                    |                          |                          |                          |                                                                                                      |                |
| Start time:                                                                                                        |                          |                          |                          |                                                                                                      |                |
| End time:                                                                                                          |                          |                          |                          |                                                                                                      |                |
|                                                                                                                    | Tick as appropriate      |                          |                          |                                                                                                      |                |
|                                                                                                                    | Present                  | Absent                   | Partially done           | If <i>partially done</i> , please provide reasons (e.g. ran out of time, forgot, deemed unnecessary) | Other comments |
| <i>Content</i>                                                                                                     |                          |                          |                          |                                                                                                      |                |
| B1) Ways relationships can be affected by stroke                                                                   | <input type="checkbox"/> | <input type="checkbox"/> | <input type="checkbox"/> |                                                                                                      |                |
| B2) Problem-solving exercise in relation to a relationship change                                                  | <input type="checkbox"/> | <input type="checkbox"/> | <input type="checkbox"/> |                                                                                                      |                |
| <i>Materials</i>                                                                                                   |                          |                          |                          |                                                                                                      |                |
| B3) Flipcharts – how can relationships change (one for stroke survivors, one for carers/supporters as applicable)  | <input type="checkbox"/> | <input type="checkbox"/> | <input type="checkbox"/> |                                                                                                      |                |
| B4) Flipcharts – ‘what is the problem exactly’; ‘what could help’; ‘solution: immediate results/long-term results’ | <input type="checkbox"/> | <input type="checkbox"/> | <input type="checkbox"/> |                                                                                                      |                |



| <i>Key facilitator behaviours for your relationships</i>                                                                                              |                          |                          |                          |                                                                                                      |                |
|-------------------------------------------------------------------------------------------------------------------------------------------------------|--------------------------|--------------------------|--------------------------|------------------------------------------------------------------------------------------------------|----------------|
|                                                                                                                                                       | Tick as appropriate      |                          |                          | If <i>partially done</i> , please provide reasons (e.g. ran out of time, forgot, deemed unnecessary) | Other comments |
|                                                                                                                                                       | Present                  | Absent                   | Partially done           |                                                                                                      |                |
| B5) Prompts or allows participants to express and explore their feelings about (the condition or behaviour) during the session                        | <input type="checkbox"/> | <input type="checkbox"/> | <input type="checkbox"/> |                                                                                                      |                |
| B6) Uses and refers to participants' comments/quotes                                                                                                  | <input type="checkbox"/> | <input type="checkbox"/> | <input type="checkbox"/> |                                                                                                      |                |
| B7) Prompts the individual or group to problem solve possible barriers to change (e.g. their desired changes or possible barriers to self-management) | <input type="checkbox"/> | <input type="checkbox"/> | <input type="checkbox"/> |                                                                                                      |                |
| B8) Prompts participants to review the impact of possible choices on their future health.                                                             | <input type="checkbox"/> | <input type="checkbox"/> | <input type="checkbox"/> |                                                                                                      |                |
| B9) Adapts communication, environment, or session delivery to meet the needs of the stroke survivors                                                  | <input type="checkbox"/> | <input type="checkbox"/> | <input type="checkbox"/> |                                                                                                      |                |

| Section C: Revisiting your stroke journey                                                                                                           |                          |                          |                          |                                                                                                      |                |
|-----------------------------------------------------------------------------------------------------------------------------------------------------|--------------------------|--------------------------|--------------------------|------------------------------------------------------------------------------------------------------|----------------|
| Facilitator(s):                                                                                                                                     |                          |                          |                          |                                                                                                      |                |
| Start time:                                                                                                                                         |                          |                          |                          |                                                                                                      |                |
| End time:                                                                                                                                           |                          |                          |                          |                                                                                                      |                |
|                                                                                                                                                     | Tick as appropriate      |                          |                          | If <i>partially done</i> , please provide reasons (e.g. ran out of time, forgot, deemed unnecessary) | Other comments |
|                                                                                                                                                     | Present                  | Absent                   | Partially done           |                                                                                                      |                |
| <i>Content</i>                                                                                                                                      |                          |                          |                          |                                                                                                      |                |
| C1) Recap the roadmap/journey analogy                                                                                                               | <input type="checkbox"/> | <input type="checkbox"/> | <input type="checkbox"/> |                                                                                                      |                |
| C2) Summary of key messages from each session (e.g. session outcomes/personal take-home messages/skills and strategies discussed during the course) | <input type="checkbox"/> | <input type="checkbox"/> | <input type="checkbox"/> |                                                                                                      |                |
| C3) Elicit feelings about moving forward from MLAS                                                                                                  | <input type="checkbox"/> | <input type="checkbox"/> | <input type="checkbox"/> |                                                                                                      |                |
| <i>Materials</i>                                                                                                                                    |                          |                          |                          |                                                                                                      |                |
| C4) Flipchart – ‘skills and strategies toolkit’                                                                                                     | <input type="checkbox"/> | <input type="checkbox"/> | <input type="checkbox"/> |                                                                                                      |                |
| <i>Key facilitator behaviours for revisiting your stroke journey</i>                                                                                |                          |                          |                          |                                                                                                      |                |
| C5) Facilitates the group’s recapping of the journey analogy (e.g. prompts group to summarise their key messages from the session)                  | <input type="checkbox"/> | <input type="checkbox"/> | <input type="checkbox"/> |                                                                                                      |                |
| C6) Prompts participants to reflect on where they feel they are now                                                                                 | <input type="checkbox"/> | <input type="checkbox"/> | <input type="checkbox"/> |                                                                                                      |                |

| Section D: How will you move forward?                                                                     |                          |                          |                          |                                                                                                      |                |
|-----------------------------------------------------------------------------------------------------------|--------------------------|--------------------------|--------------------------|------------------------------------------------------------------------------------------------------|----------------|
| Facilitator(s):                                                                                           |                          |                          |                          |                                                                                                      |                |
| Start time:                                                                                               |                          |                          |                          |                                                                                                      |                |
| End time:                                                                                                 |                          |                          |                          |                                                                                                      |                |
|                                                                                                           | Tick as appropriate      |                          |                          | If <i>partially done</i> , please provide reasons (e.g. ran out of time, forgot, deemed unnecessary) | Other comments |
|                                                                                                           | Present                  | Absent                   | Partially done           |                                                                                                      |                |
| <i>Content</i>                                                                                            |                          |                          |                          |                                                                                                      |                |
| D1) Discussion of 'warning lights' for physical/emotional health and prevention of these                  | <input type="checkbox"/> | <input type="checkbox"/> | <input type="checkbox"/> |                                                                                                      |                |
| D2) Loneliness from the perspective of the fictional character (may also use problem-solving exercise)    | <input type="checkbox"/> | <input type="checkbox"/> | <input type="checkbox"/> |                                                                                                      |                |
| D3) The directory                                                                                         | <input type="checkbox"/> | <input type="checkbox"/> | <input type="checkbox"/> |                                                                                                      |                |
| <i>Materials</i>                                                                                          |                          |                          |                          |                                                                                                      |                |
| D4) A4 dashboard images                                                                                   | <input type="checkbox"/> | <input type="checkbox"/> | <input type="checkbox"/> |                                                                                                      |                |
| D5) Flipchart - 'Skills and strategies toolkit'                                                           | <input type="checkbox"/> | <input type="checkbox"/> | <input type="checkbox"/> |                                                                                                      |                |
| D6) A4 directory                                                                                          | <input type="checkbox"/> | <input type="checkbox"/> | <input type="checkbox"/> |                                                                                                      |                |
| <i>Key facilitator behaviours for how will you move forward</i>                                           |                          |                          |                          |                                                                                                      |                |
| D7) Prompts or allows participants to express and explore their feelings about the condition or behaviour | <input type="checkbox"/> | <input type="checkbox"/> | <input type="checkbox"/> |                                                                                                      |                |
| D8) Encourages the group to discuss/answer their own questions                                            | <input type="checkbox"/> | <input type="checkbox"/> | <input type="checkbox"/> |                                                                                                      |                |
| D9) Uses and refers to participants' comments/quotes                                                      | <input type="checkbox"/> | <input type="checkbox"/> | <input type="checkbox"/> |                                                                                                      |                |

| Section E: Next steps                                                                          |                          |                          |                          |                                                                                                      |                |
|------------------------------------------------------------------------------------------------|--------------------------|--------------------------|--------------------------|------------------------------------------------------------------------------------------------------|----------------|
| Facilitator(s):                                                                                |                          |                          |                          |                                                                                                      |                |
| Start time:                                                                                    |                          |                          |                          |                                                                                                      |                |
| End time:                                                                                      |                          |                          |                          |                                                                                                      |                |
|                                                                                                | Tick as appropriate      |                          |                          | If <i>partially done</i> , please provide reasons (e.g. ran out of time, forgot, deemed unnecessary) | Other comments |
|                                                                                                | Present                  | Absent                   | Partially done           |                                                                                                      |                |
| <i>Content</i>                                                                                 |                          |                          |                          |                                                                                                      |                |
| E1) Recap session's key outcomes                                                               | <input type="checkbox"/> | <input type="checkbox"/> | <input type="checkbox"/> |                                                                                                      |                |
| E2) 'What will I do now?' worksheet                                                            | <input type="checkbox"/> | <input type="checkbox"/> | <input type="checkbox"/> |                                                                                                      |                |
| E3) Organise follow-up appointments                                                            | <input type="checkbox"/> | <input type="checkbox"/> | <input type="checkbox"/> |                                                                                                      |                |
| <i>Materials</i>                                                                               |                          |                          |                          |                                                                                                      |                |
| E4) 'What will I do now?' worksheet in the handbook                                            | <input type="checkbox"/> | <input type="checkbox"/> | <input type="checkbox"/> |                                                                                                      |                |
| E5) Flipchart – 'what would you like to get from the course?/What is your important question?' | <input type="checkbox"/> | <input type="checkbox"/> | <input type="checkbox"/> |                                                                                                      |                |
| <i>Key facilitator behaviours for next steps</i>                                               |                          |                          |                          |                                                                                                      |                |
| E6) Prompts group to summarise their key messages from the session.                            | <input type="checkbox"/> | <input type="checkbox"/> | <input type="checkbox"/> |                                                                                                      |                |
| E7) Prompts participants to talk about what they are going to do as a result of the course.    | <input type="checkbox"/> | <input type="checkbox"/> | <input type="checkbox"/> |                                                                                                      |                |
| E8) Encourages the group to discuss/answer their own questions                                 | <input type="checkbox"/> | <input type="checkbox"/> | <input type="checkbox"/> |                                                                                                      |                |

| Overall facilitator behaviours                                                                                        |                          |                          |                          |                                                                                                      |                |
|-----------------------------------------------------------------------------------------------------------------------|--------------------------|--------------------------|--------------------------|------------------------------------------------------------------------------------------------------|----------------|
|                                                                                                                       | Tick as appropriate      |                          |                          | If <i>partially done</i> , please provide reasons (e.g. ran out of time, forgot, deemed unnecessary) | Other comments |
|                                                                                                                       | Present                  | Absent                   | Partially done           |                                                                                                      |                |
| 1. Uses non-judgmental statements in response to participants' verbal utterances                                      | <input type="checkbox"/> | <input type="checkbox"/> | <input type="checkbox"/> |                                                                                                      |                |
| 2. The facilitator seeks clarification of participants contribution                                                   | <input type="checkbox"/> | <input type="checkbox"/> | <input type="checkbox"/> |                                                                                                      |                |
| 3. Avoids giving their own opinion                                                                                    | <input type="checkbox"/> | <input type="checkbox"/> | <input type="checkbox"/> |                                                                                                      |                |
| 4. Encourages the group to discuss/answer their own questions and/or elicits suggestions from participants            | <input type="checkbox"/> | <input type="checkbox"/> | <input type="checkbox"/> |                                                                                                      |                |
| 5. Engages participants using rapport building skills                                                                 | <input type="checkbox"/> | <input type="checkbox"/> | <input type="checkbox"/> |                                                                                                      |                |
| 6. Notices tone/dynamics within the group, acknowledges these and uses them to manage the group                       | <input type="checkbox"/> | <input type="checkbox"/> | <input type="checkbox"/> |                                                                                                      |                |
| 7. The facilitator uses strategies to manage time within session                                                      | <input type="checkbox"/> | <input type="checkbox"/> | <input type="checkbox"/> |                                                                                                      |                |
| 8. Uses open questions, reflections, appropriate silences and open body language to facilitate group/participant talk | <input type="checkbox"/> | <input type="checkbox"/> | <input type="checkbox"/> |                                                                                                      |                |
| 9. Adapts communication/environment/ session delivery to meet the needs of the stroke survivors                       | <input type="checkbox"/> | <input type="checkbox"/> | <input type="checkbox"/> |                                                                                                      |                |
| 10. Works as a team with co-facilitator                                                                               | <input type="checkbox"/> | <input type="checkbox"/> | <input type="checkbox"/> |                                                                                                      |                |

Assessor comments/notes

v1.4

29/05/2019
